# Supplementary figures and images for: Dual functional ionic liquids as antimicrobials and plasticisers for medical grade PVCs
Source: Royal Society of Chemistry journal article supplement (doi:10.1039/c3ra46425c), 2014-01-01

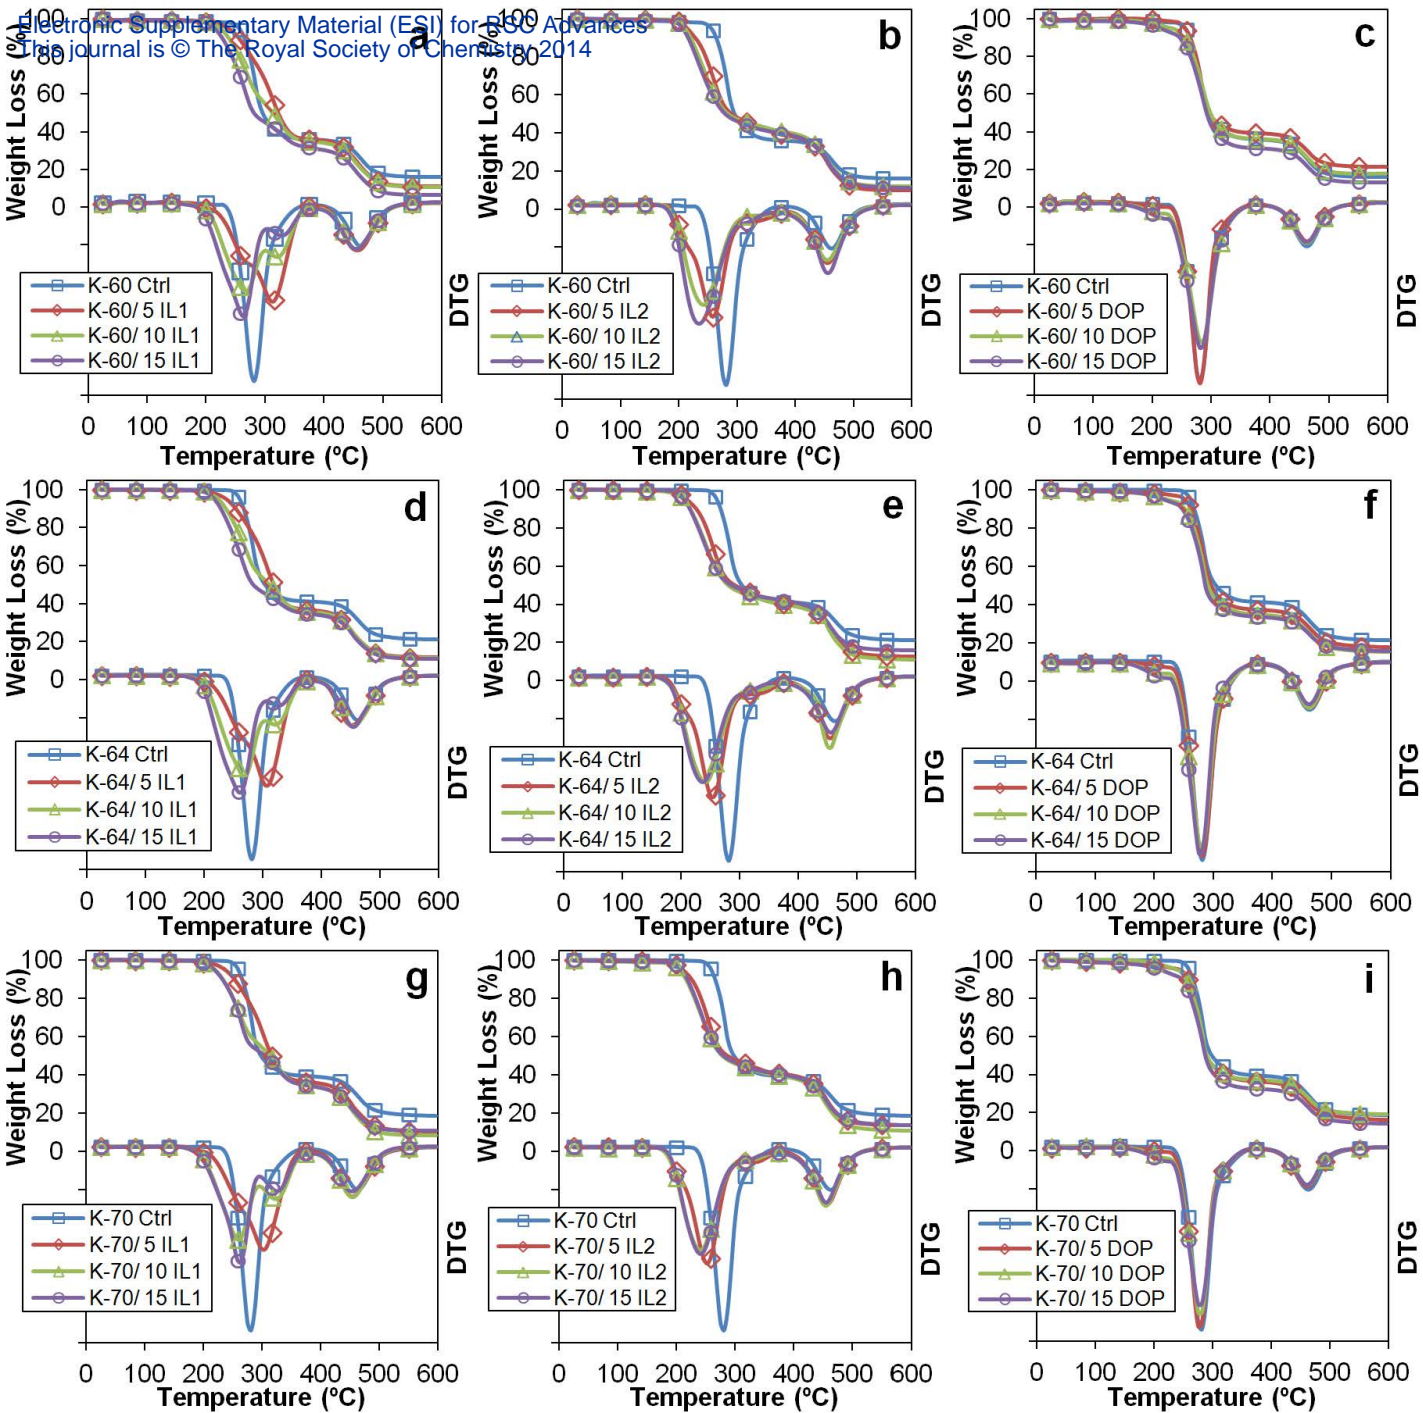

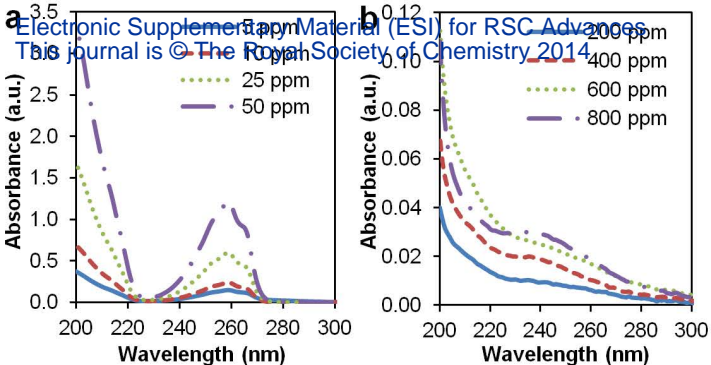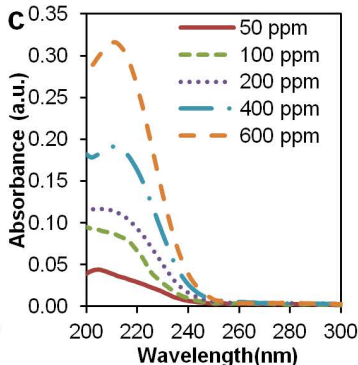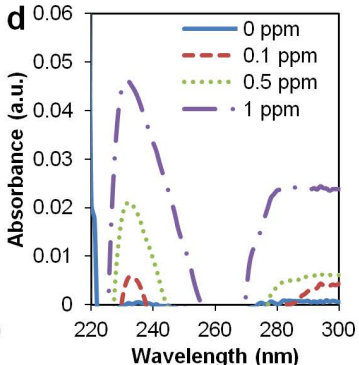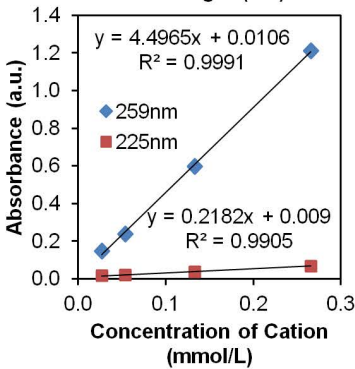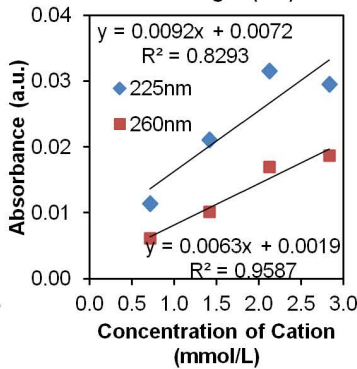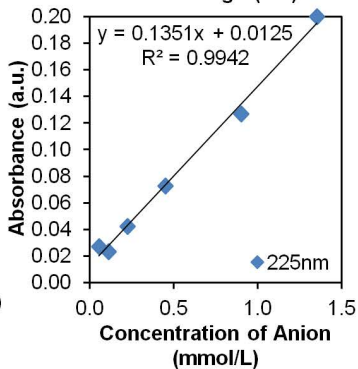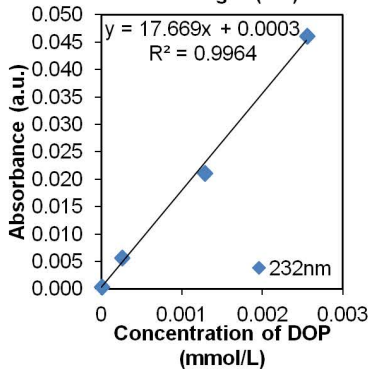

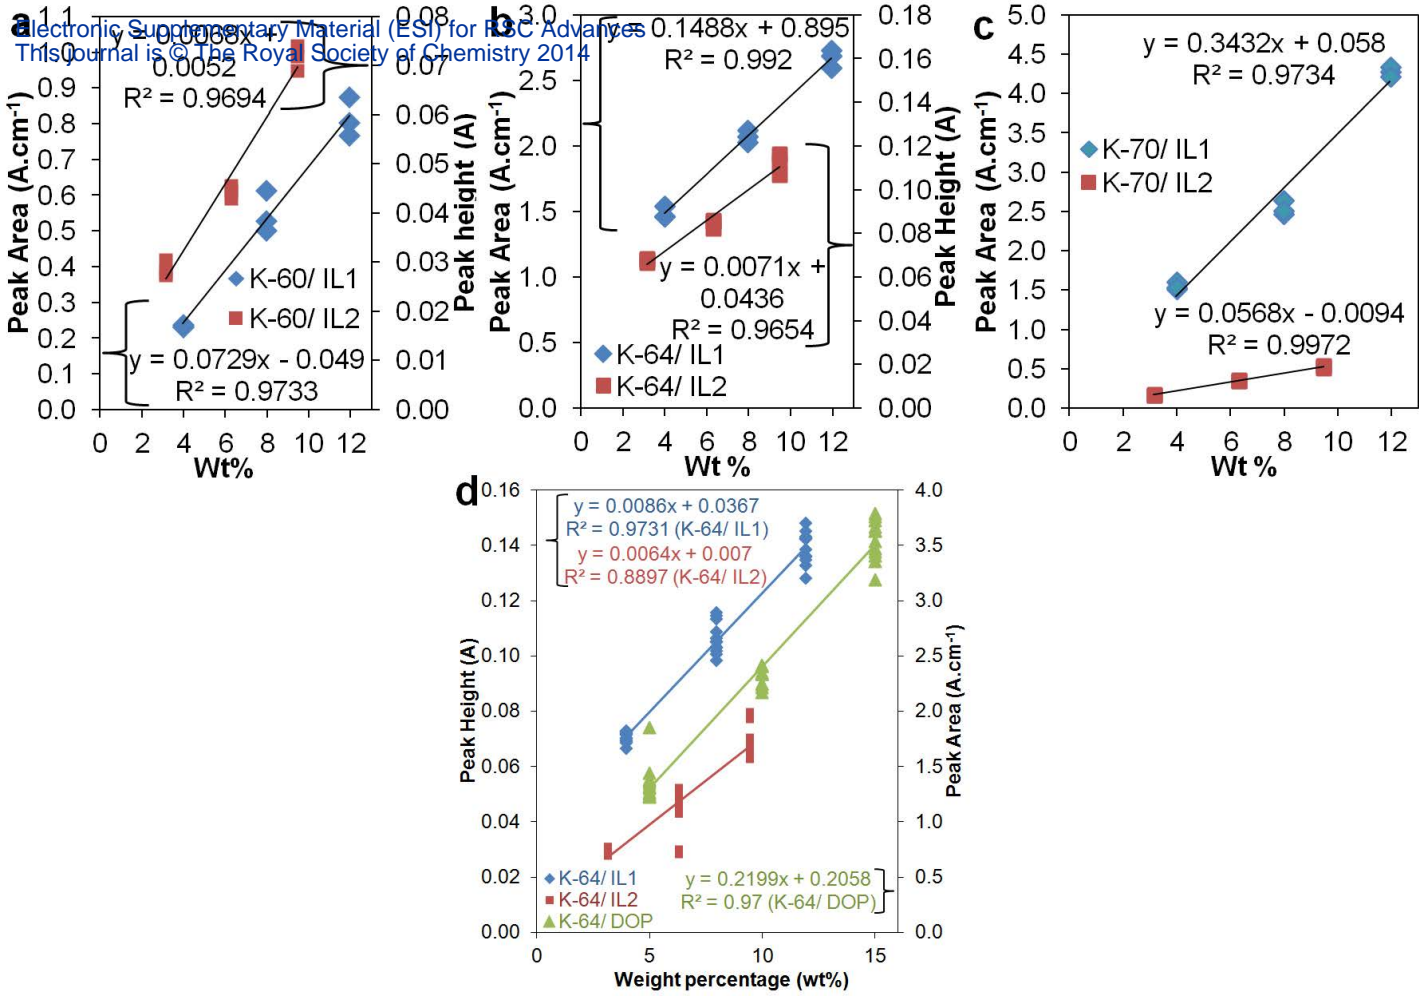

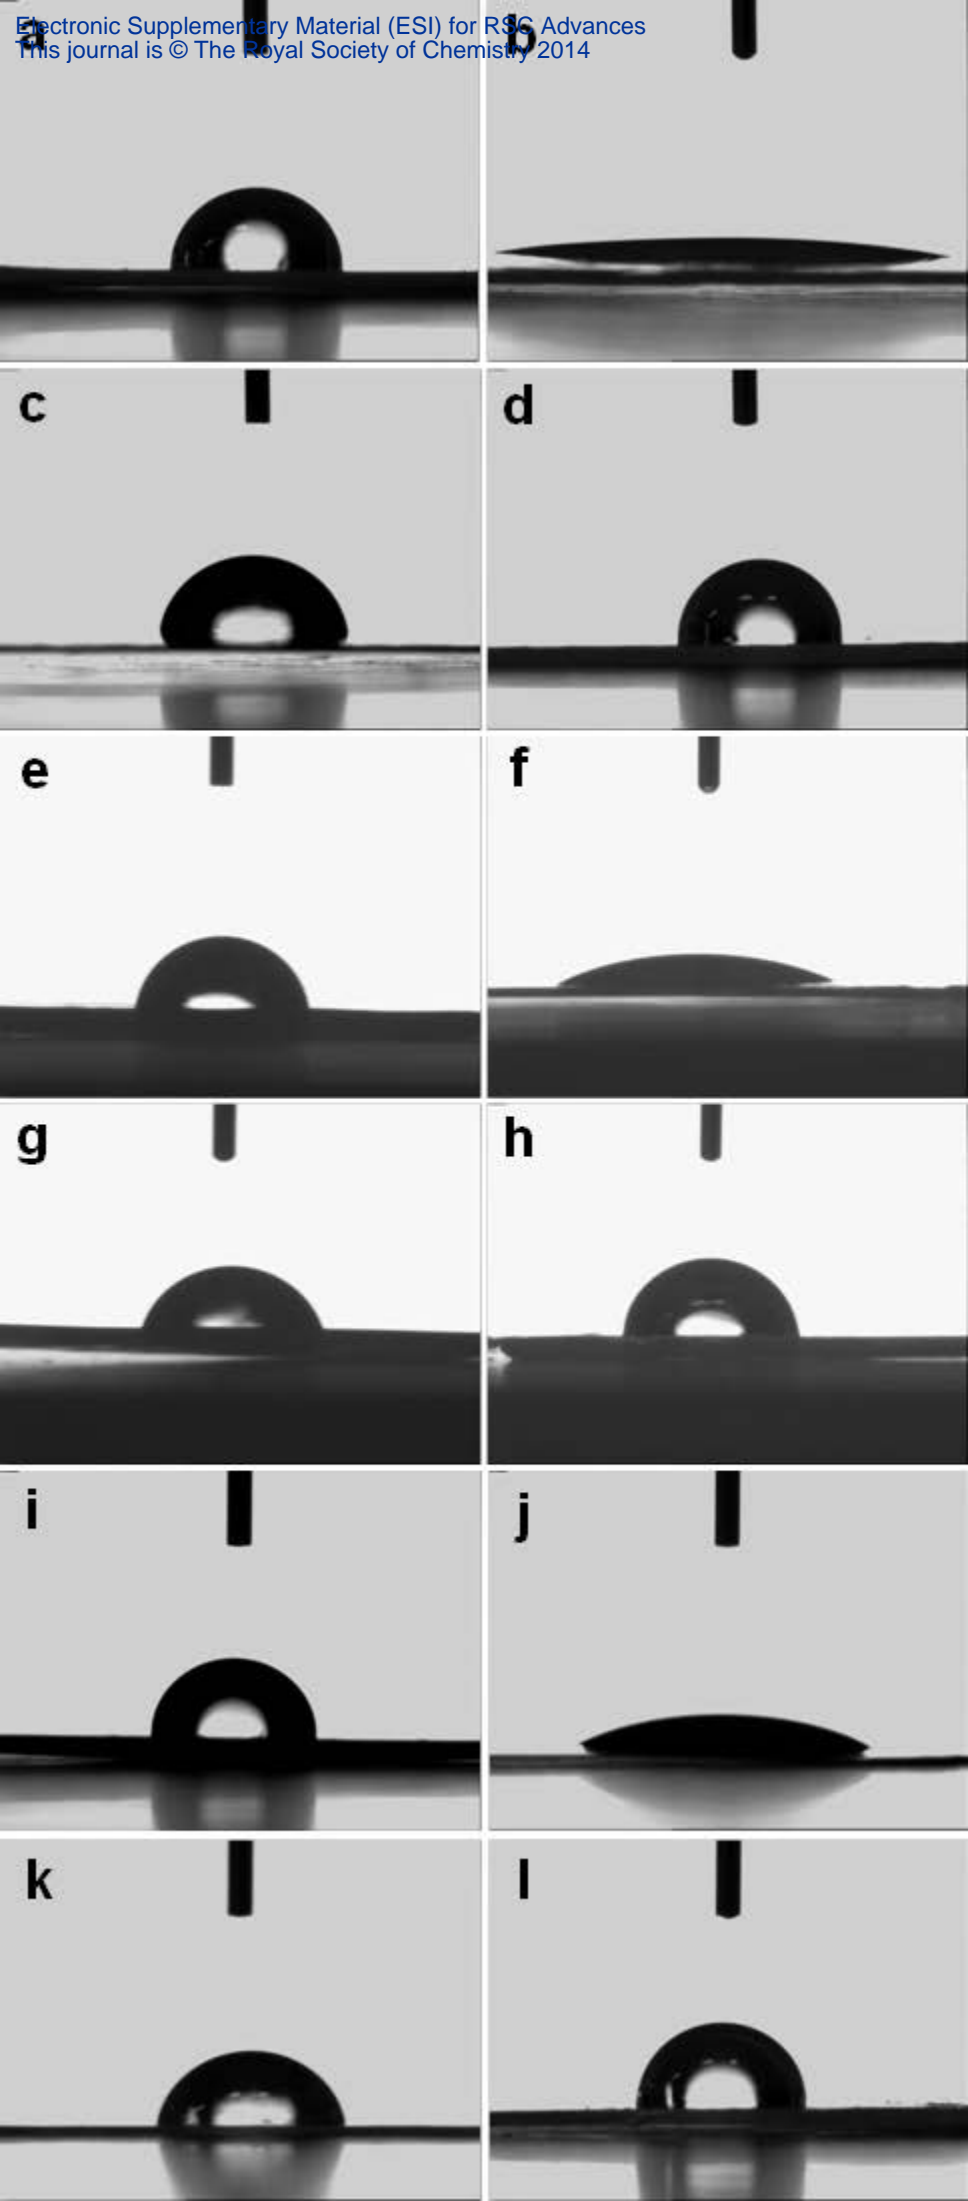



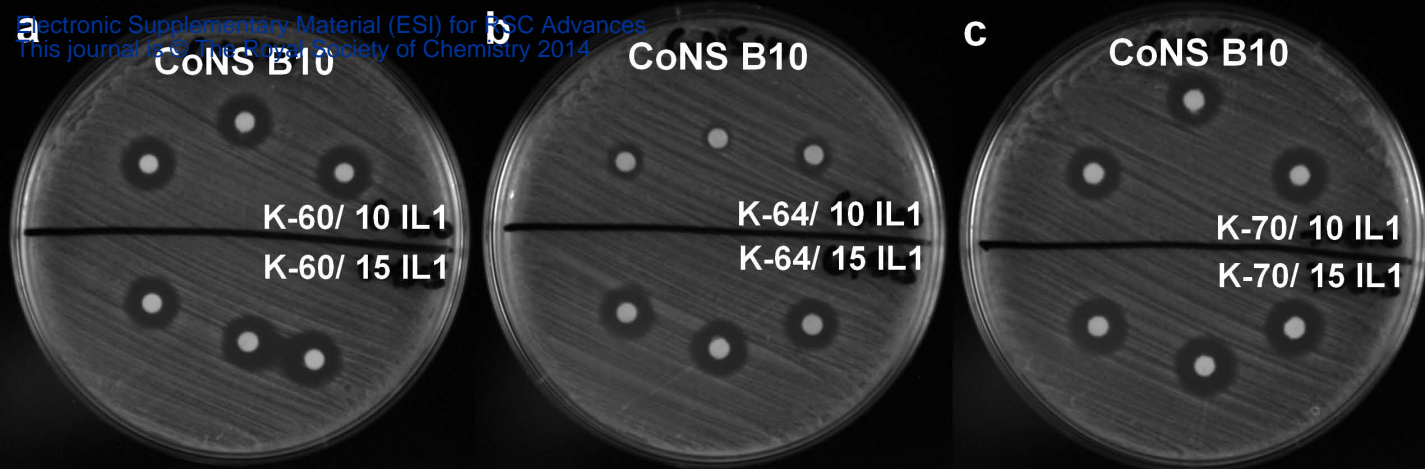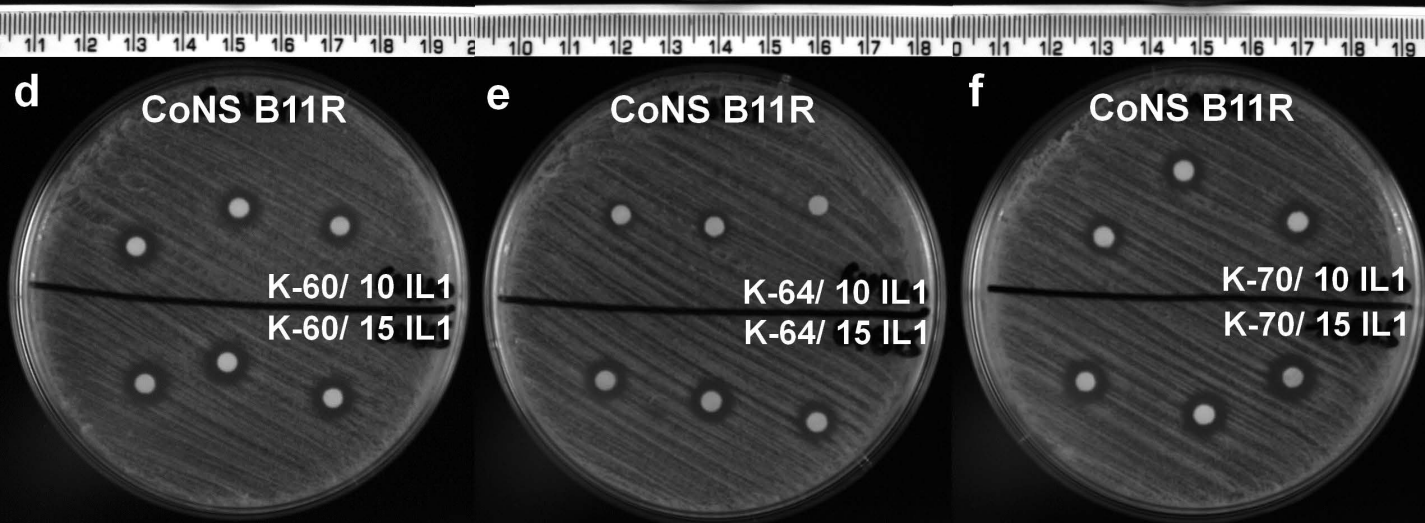

Supplement: c3ra46425c.pdf [file c3ra46425c.pdf]
